# Supplementary material
Source: PubMed Central journal article supplement (PMC6710145)
Supplement: NIHMS1533392-supplement-Supplemental_Material.pdf [file NIHMS1533392-supplement-Supplemental_Material.pdf]

## **SUPPLEMENTAL MATERIAL**

### **1. Supplemental Tables I**

Rates of good neurological outcome by ASPECTS subgroups

### **2. Supplemental Tables II**

a. Angiographic collateral grades by sex

b. Rates of good neurological outcome by collateral grade and sex in patients with TICI 2b/3 reperfusion

### **3. Supplemental Tables III**

Unadjusted outcomes using primary life expectancy calculation

### **4. Supplemental Tables IV**

Unadjusted outcomes using sensitivity analysis life expectancy calculation

### **5. Supplemental Tables V**

Disability-adjusted life year outcomes using sensitivity analysis life expectancy calculation

### **6. Supplemental Figure I**

Forest plot showing change in adjusted disability adjusted life years of SWIFT, STAR, and SWIFT-PRIME study

**Supplemental Table I.** Rates of good neurological outcome by ASPECTS subgroups

|              | <b>Male with 90d mRS 0-2<br/>%</b> | <b>Female with 90d mRS 0-2<br/>%</b> | <b>P-value</b> |
|--------------|------------------------------------|--------------------------------------|----------------|
| ASPECTS 0-6  | 41%                                | 38%                                  | 0.83           |
| ASPECTS 7-8  | 53%                                | 60%                                  | 0.46           |
| ASPECTS 9-10 | 75%                                | 65%                                  | 0.24           |

\*Data are reported as %

†Abbreviation: mRS, modified Rankin scale; ASPECTS, Alberta stroke program early CT scan score

**Supplemental Table II a.** Angiographic collateral grades by sex

|                             | <b>Female No. (%)<br/>(n=153)</b> | <b>Male No. (%)<br/>(n=120)</b> | <b>p-value</b> |
|-----------------------------|-----------------------------------|---------------------------------|----------------|
| <b>Collateral Grade 0-2</b> | 61 (39.9%)                        | 45 (37.5%)                      | 0.71           |
| <b>Collateral Grade 3-4</b> | 92 (60.1%)                        | 75 (62.5%)                      | 0.71           |

\*Data are reported as n/N (%)

**Supplemental Table II b.** Rates of good neurological outcome by collateral grade and sex in patients with TICI 2b/3 reperfusion

|                             | <b>Female with 90d mRS 0-2<br/>n/N (%) (n=149)</b> | <b>Male with 90d mRS 0-2<br/>n/N (%) (n=117)</b> | <b>p-value</b> |
|-----------------------------|----------------------------------------------------|--------------------------------------------------|----------------|
| <b>Collateral Grade 0-2</b> | 40/89 (44.9%)                                      | 37/73 (50.7%)                                    | 0.53           |
| <b>Collateral Grade 3-4</b> | 40/60 (66.7%)                                      | 32/44 (72.7%)                                    | 0.53           |

\*Data are reported as n/N (%)

†Abbreviation: mRS, modified Rankin scale

**Supplemental Table III.** Unadjusted outcomes using primary life expectancy calculation

| <b>Metric</b>                                  | <b>Male (n=175)</b> | <b>Female (n=214)</b> | <b>p-value*</b> |
|------------------------------------------------|---------------------|-----------------------|-----------------|
| <b>Age (years)</b>                             | 64 ± 12             | 69 ± 13               | <0.001          |
| <b>NIHSS at baseline</b>                       | 17 ± 5              | 17 ± 5                | 0.31            |
| <b>Full life expectancy</b>                    | 19 ± 9              | 18 ± 10               | 0.02            |
| <b>Life expectancy post-stroke</b>             | 12 ± 9              | 12 ± 10               | 0.17            |
| <b>Disability-adjusted life years expected</b> | 10 ± 9              | 9 ± 9                 | 0.48            |

\* p-values from Wilcoxon's nonparametric signed-rank test

†Data are reported as Mean ± SD

‡Abbreviation: NIHSS, national institutes of health stroke scale

**Supplemental Table IV.** Unadjusted outcomes using sensitivity analysis life expectancy calculation

| <b>Metric</b>                                  | <b>Male (n=175)</b> | <b>Female (n=214)</b> | <b>p-value*</b> |
|------------------------------------------------|---------------------|-----------------------|-----------------|
| <b>Age (years)</b>                             | 64 ± 12             | 69 ± 13               | <0.001          |
| <b>NIHSS at baseline</b>                       | 17 ± 5              | 17 ± 5                | 0.31            |
| <b>Full life expectancy</b>                    | 19 ± 9              | 18 ± 10               | 0.02            |
| <b>Life expectancy post-stroke</b>             | 12 ± 9              | 12 ± 10               | 0.30            |
| <b>Disability-adjusted life years expected</b> | 10 ± 9              | 10 ± 10               | 0.63            |

\* p-values from Wilcoxon's nonparametric signed-rank test

† Data are reported as Mean ± SD

‡ Abbreviation: NIHSS, national institutes of health stroke scale

**Supplemental Table V.** Disability-adjusted life year outcomes using sensitivity analysis life expectancy calculation

| <b>Parameter</b>                                              | <b>Change in DALY per unit of parameter</b> | <b>Standard Error</b> | <b>p-value</b> |
|---------------------------------------------------------------|---------------------------------------------|-----------------------|----------------|
| <b>Age (linear, per year of age)</b>                          | -1.5                                        | 0.2                   | <.0001         |
| <b>Age (quadratic, per year of squared age)</b>               | 0.007                                       | 0.001                 | <.0001         |
| <b>NIHSS at baseline (linear, per point)</b>                  | -1.2                                        | 0.3                   | 0.0004         |
| <b>Age by NIHSS interaction (quadratic, per year x point)</b> | 0.01                                        | 0.005                 | 0.0107         |
| <b>Pre-stroke mRS (per point)</b>                             | -1.4                                        | 0.4                   | 0.0007         |
| <b>Atrial fibrillation (yes vs no)</b>                        | 0.5                                         | 0.6                   | 0.4289         |
| <b>Smoking status (yes vs no)</b>                             | 0.7                                         | 0.8                   | 0.3633         |
| <b>IV-tPA administered (yes vs no)</b>                        | 0.05                                        | 0.6                   | 0.9339         |
| <b>Female gender (versus male)</b>                            | 11.2                                        | 3.1                   | 0.0003         |
| <b>Per year of age, female gender (versus male)</b>           | -0.13                                       | 0.05                  | 0.0047         |

\*Abbreviation: NIHSS, national institutes of health stroke scale; mRS, modified Rankin Scale; IV-

tPA, intravenous tissue plasminogen activator

**Supplemental Figure I.** Forest plot showing disability adjusted life years expectancy (DALYs) of SWIFT, STAR, and SWIFT-PRIME study

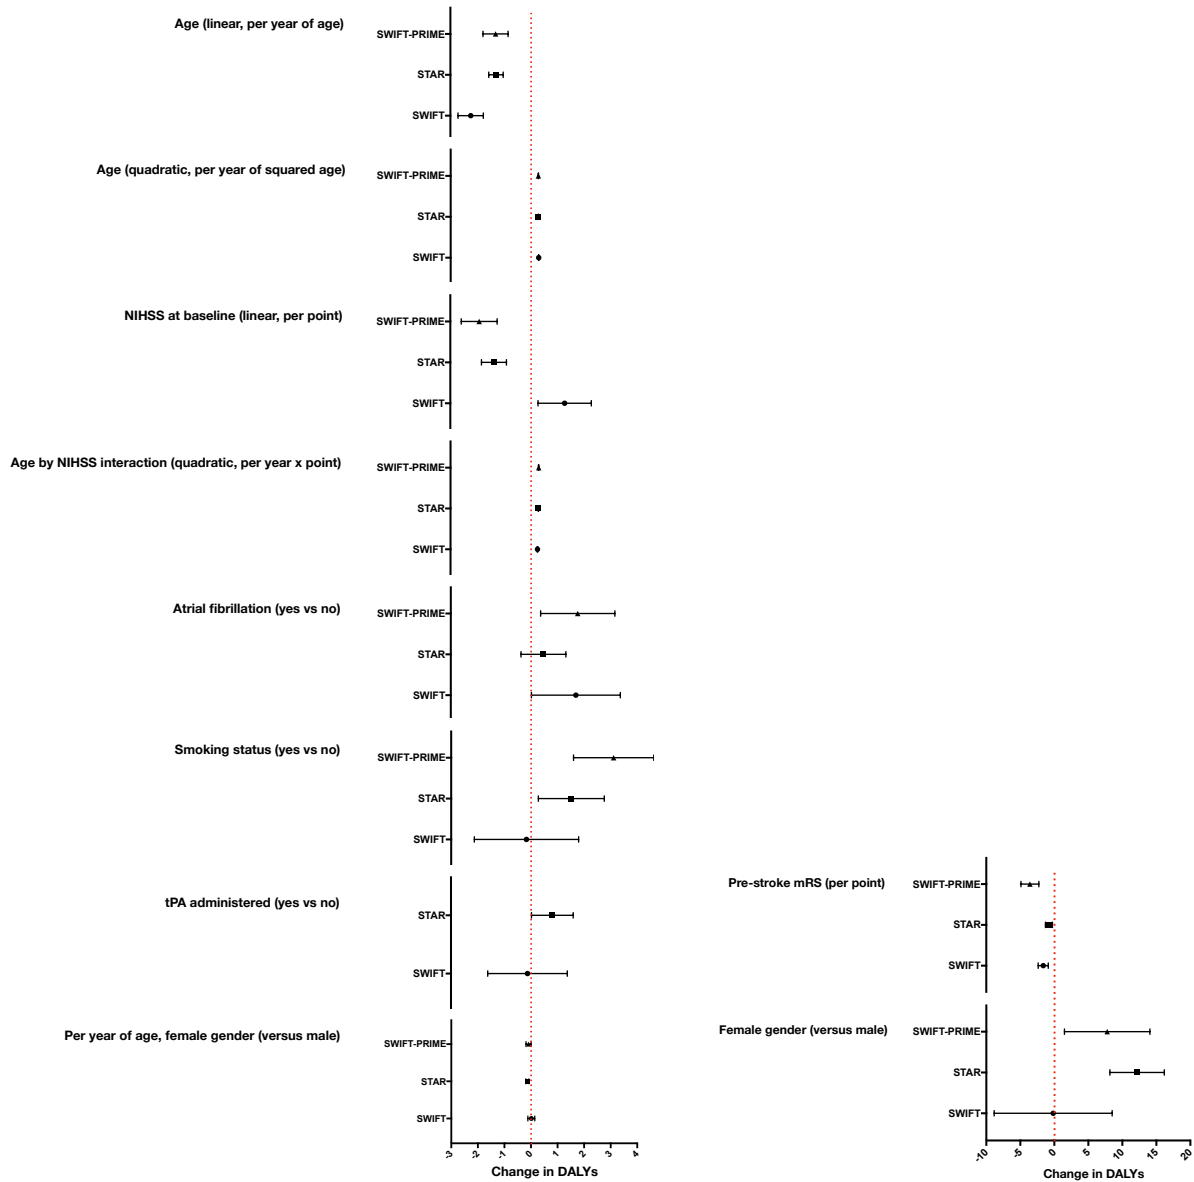

Multivariate model for each study showing change in DALYs with adjusting parameters.

\*Abbreviation: NIHSS, national institutes of health stroke scale; tPA, tissue plasminogen activator; mRS, modified Rankin scale ; DALYs, disability-adjusted life years
